# Supplementary material
Source: MDPI journal article supplement (https://www.mdpi.com/2813-2564/2/4/18)
Supplement: s1 [file s1]

Archive with 1 entries (1 files):
- receptors-2628412-supplementary.pdf
