# Supplementary material
Source: MDPI journal article supplement (https://www.mdpi.com/2813-2564/2/4/18)
Supplement: s1 [file s1 › receptors-2628412-supplementary.pdf]

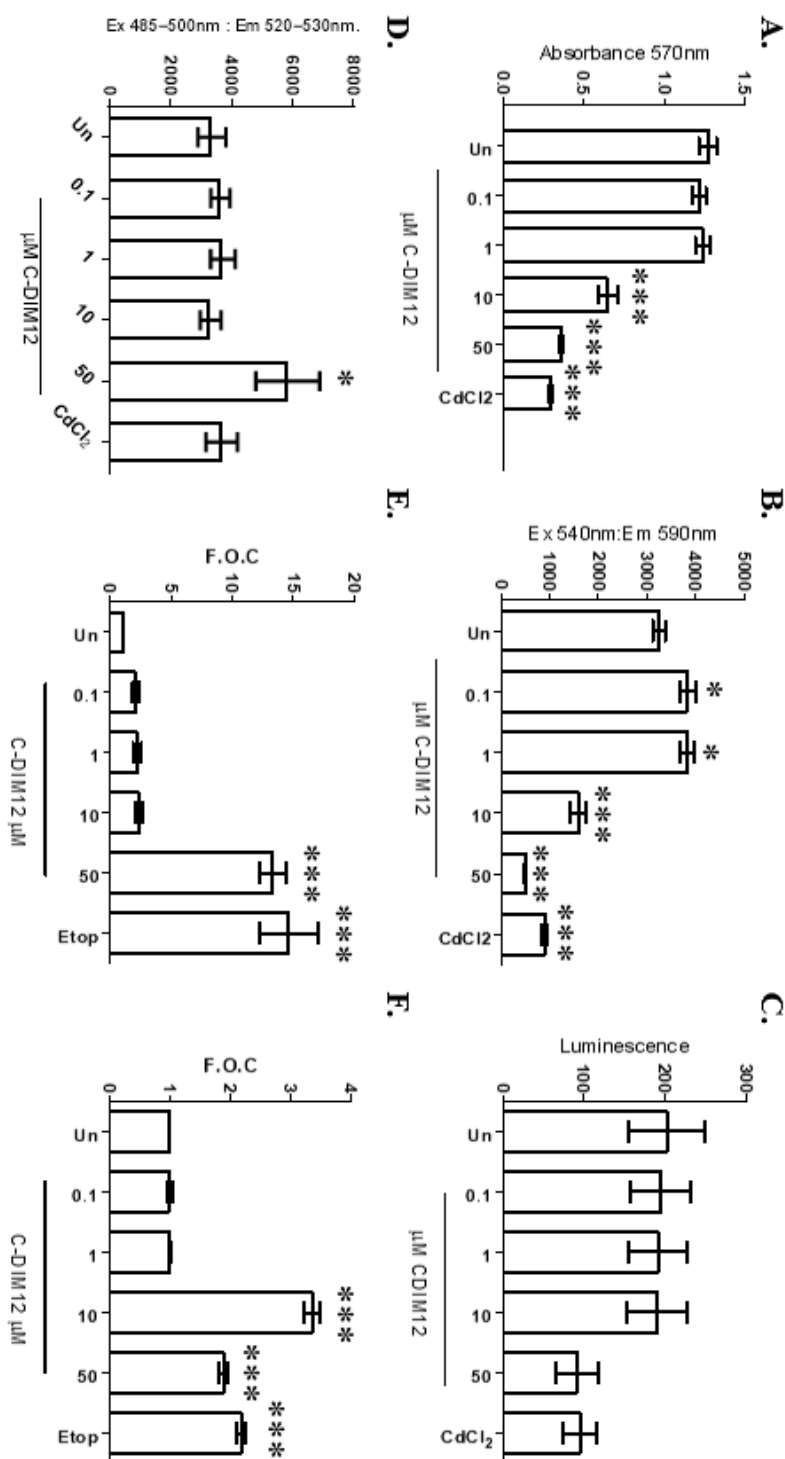

**Figure S1.** Cytotoxicity analysis of C-DIM12 in THP-1 cells. THP-1 cells were treated with C-DIM12 at varying concentrations (0.1, 1, 10 and 50  $\mu$ M) alongside untreated controls (Un) and positive controls Cadmium Chloride (CdCl<sub>2</sub>) (100  $\mu$ M) and Etoposide (Etop) (100  $\mu$ M). At 24h MTT assay, Resazurin assay, RealTime Glo MT assay, CellTox Green assay were performed (A,B,C and D, respectively). At 4h and 24h caspase 3/7 activity assay was performed (E and F). Statistical analysis was performed using a one-way analysis of variance (ANOVA) with a Dunnett's post-hoc test, \* $< 0.00$ , \*\*\* $< 0.001$ . A star (\*) denotes significance compared to Un cells.
